# Supplementary material
Source: PubMed Central journal article supplement (PMC4241569)
Supplement: NIHMS625548-supplement-Supplement.pdf [file NIHMS625548-supplement-Supplement.pdf]

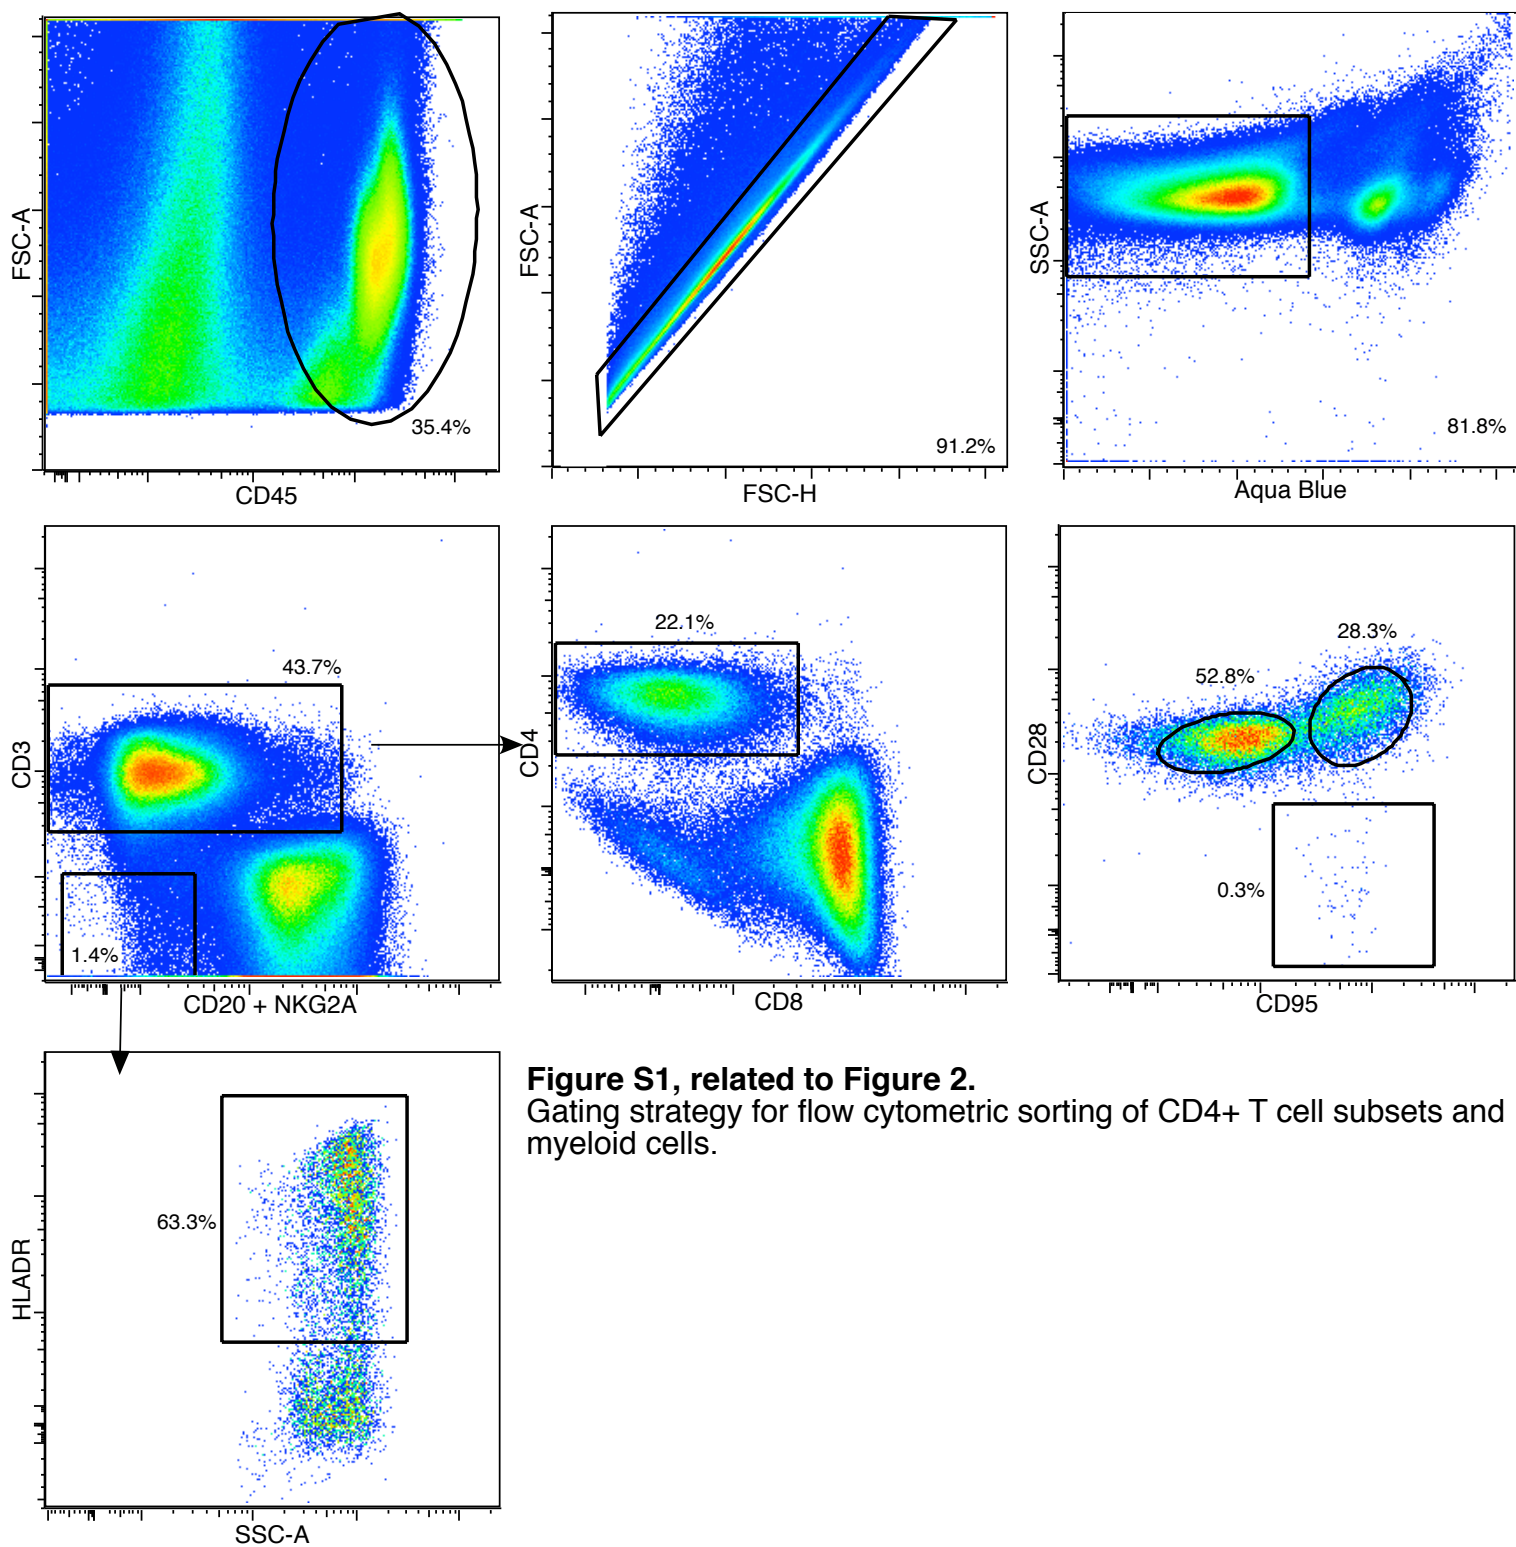

**Figure S1, related to Figure 2.**

Gating strategy for flow cytometric sorting of CD4+ T cell subsets and myeloid cells.

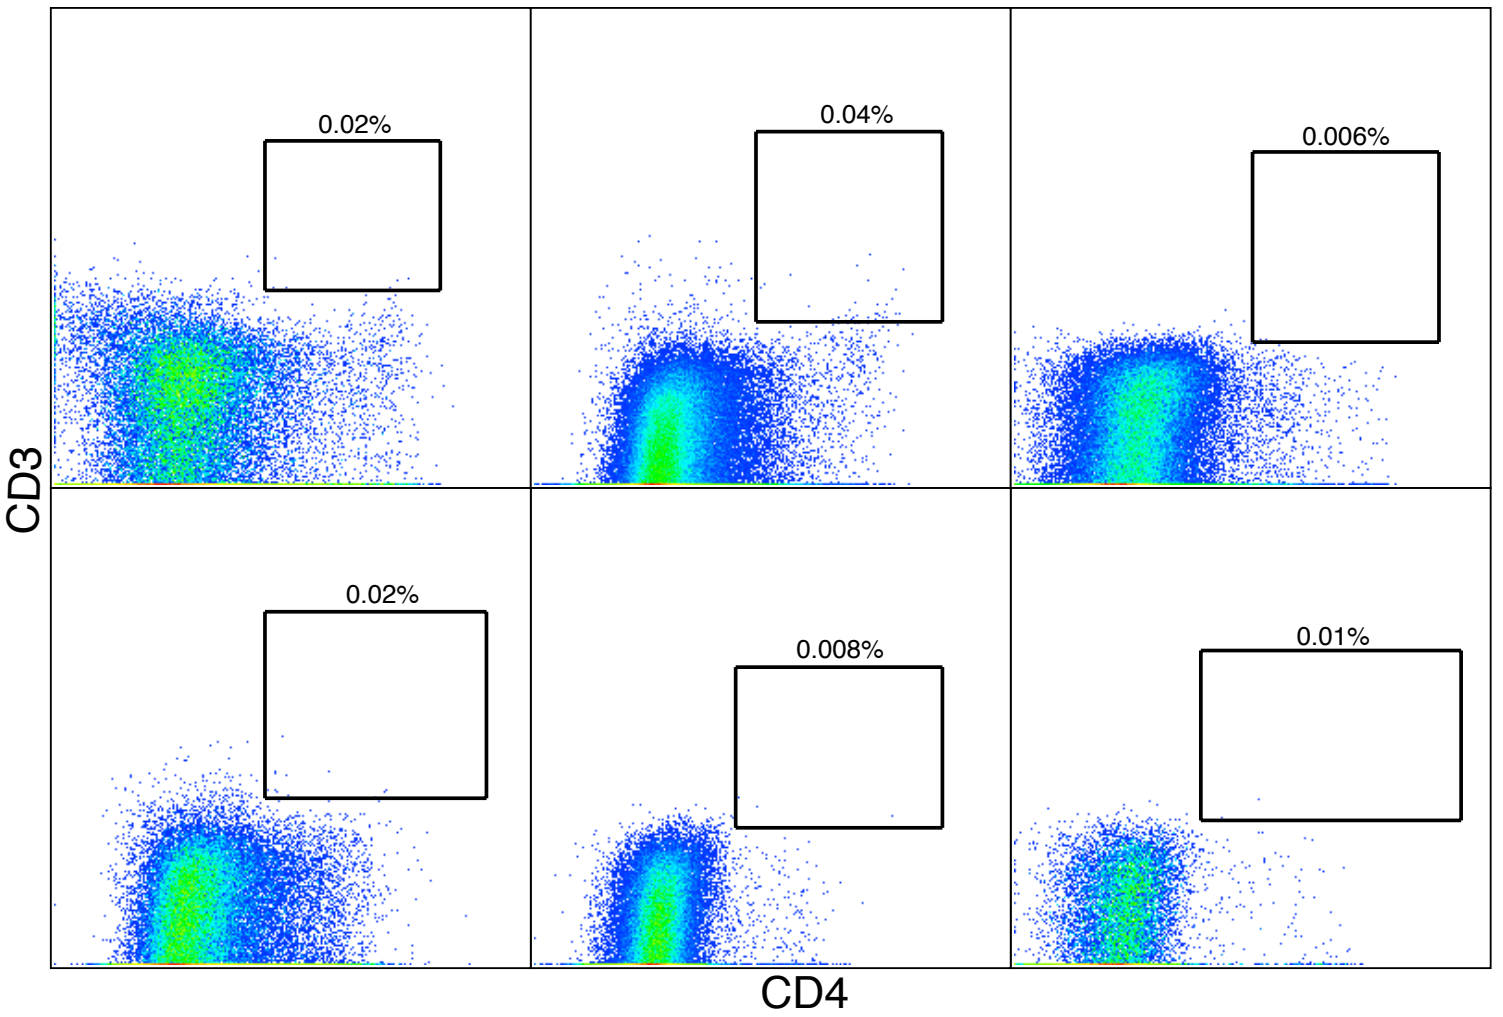

**Figure S2, related to Figure 3.** Post-sort purity analysis of splenic myeloid cells.
